# Supplementary material for: Highly sensitive MRI contrast agent for enhanced visualization of tumors
Source: Royal Society of Chemistry journal article supplement (doi:10.1039/c4nj00183d), 2014-01-01
Supplement: c4nj00183d1.pdf [file c4nj00183d1.pdf]

Supporting information for

**High Sensitive MRI Contrast Agent Enhanced Visualization of Tumor**

Xiao-xia Song,<sup>a</sup> Zhi-jun Liu,<sup>a</sup> Xian-zhu Xu,<sup>b</sup> Qun Tang<sup>\*a</sup>

<sup>a</sup> Institute for Advanced Study, Nanchang University, Nanchang, China.

<sup>b</sup> College of Life Science, Jiangxi Normal University, Nanchang, China.

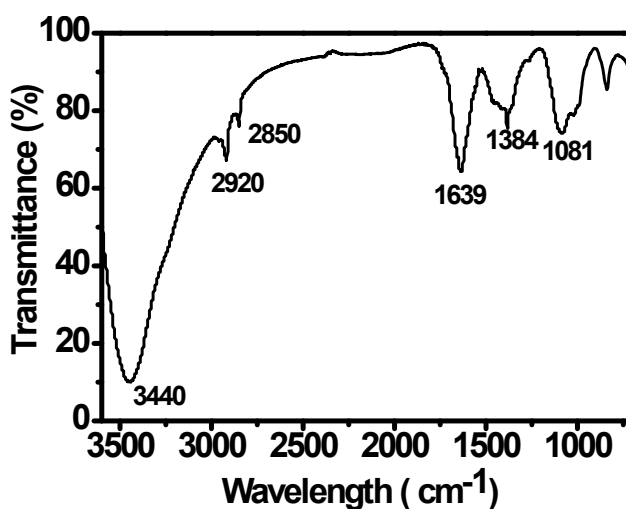

Figure S1. FT-IR spectrum of the c(RGDyK) peptide, the characteristic peaks were located at 3440 cm<sup>-1</sup> (-N-H stretch), 2920 cm<sup>-1</sup> (-C-H symmetric stretch), 2850 cm<sup>-1</sup> (-C-H antisymmetric stretch), 1639 cm<sup>-1</sup> (-C=O stretch), 1081 cm<sup>-1</sup> (-C-O-).
